# Supplementary material
Source: PubMed Central journal article supplement (PMC4350665)
Supplement: NIHMS665654-supplement-Supplemental_Material.pdf [file NIHMS665654-supplement-Supplemental_Material.pdf]

## Supplementary Materials for

### **A Wnt-TGF $\beta$ 2 axis induces a fibrogenic program in muscle stem cells from dystrophic mice**

Stefano Biressi, Elen H. Miyabara, Suchitra D. Gopinath, Poppy M. M. Carlig,  
Thomas A. Rando\*

\*Corresponding author. E-mail: rando@stanford.edu

Published 17 December 2014, *Sci. Transl. Med.* **6**, 267ra176 (2014)

DOI: 10.1126/scitranslmed.3008411

#### **The PDF file includes:**

##### Methods

Fig. S1. Fibrotic features are induced in satellite cells in *mdx*<sup>5Cv</sup> mice.

Fig. S2. Cells of the satellite cell lineage are present in the muscle interstitium in *mdx*<sup>5Cv</sup> mice.

Fig. S3. In vitro alteration of canonical Wnt signaling.

Fig. S4.  $\beta$ -Catenin binds to the *Tgf $\beta$ 2* locus.

Fig. S5. Expression of TGF $\beta$  receptors in satellite cell progeny.

Fig. S6. Wnt-TGF $\beta$ 2 axis induces fibrogenic features in myoblasts in vitro.

Fig. S7. The Wnt-Tgf $\beta$ 2 axis is active in dystrophic muscles.

Fig. S8. TGF $\beta$  signaling induces fibrogenic features in satellite cells in *mdx*<sup>5Cv</sup> muscles.

Fig. S9. Blocking TGF $\beta$  signaling ameliorates the dystrophic phenotype.

Table S1. List of genes that are significantly increased ( $\geq 2.5$ -fold) in Wnt3a-treated myoblasts.

Table S2. Primer list for genotyping PCR.

Table S3. Primer list for SYBR Green real-time PCR.

Table S4. Antibody list for immunofluorescence.

Table S5. Primer list for ChIP assay.

References (91–94)

## Supplementary Methods

### Hematoxylin/Eosin (H&E)

Snap-frozen sections (8  $\mu\text{m}$ ) were stained with hematoxylin, washed in water, and stained with eosin. Sections were dehydrated through graded alcohols to xylenes.

### *Detection of mouse TGF $\beta$ receptors*

Cells were incubated according to manufacturer instructions with a biotinylated antibody recognizing mouse TGF $\beta$  receptor 2 (BAF532, R&D; 1:50) or biotinylated goat control IgG (BAF108, R&D; 1:50) and subsequently stained with PE-Cy7 conjugated streptavidin (Biolegend). Cells were purified using a FACSAria III (BD) and analyzed with Flowjo 7.6.5 software. DAPI dilactate (250  $\mu\text{g}/\mu\text{l}$ ) was used to exclude dead cells.

For RT-PCR analysis, C2C12 and 293T cells (ATCC) were cultured in DMEM with 10% FBS. In the absence of any transcript detection by mouse specific primers in human 293T cells, the Ct values were set to 40.

### *Chromatin Immunoprecipitation*

Primary myoblasts were cultured in Ham's F-10 with 20% FBS and 2.5 ng/ml bFGF. To induce Wnt signaling,  $10^7$  cells were incubated with 100 ng/ml of Wnt3a for 4 hours. Chromatin was cross-linked with 1% formaldehyde for 10 minutes, followed by quenching with 0.125 M Glycine for 5 minutes. Cells were washed in PBS and scraped in Lysis buffer (1% SDS, 10 mM EDTA, 50 mM Tris-HCl, pH 8.0 and protease inhibitors), and chromatin was sheared with a

Sonicator (Misonix) eight times for 15 seconds at an amplitude setting of 15. Lysate was diluted in ChIP dilution buffer (0.01% SDS, 1.1% TritonX-100, 1.2 mM EDTA, 16.7 mM Tris-HCl, 167 mM NaCl) and incubated with 5  $\mu$ g of anti- $\beta$ -Catenin antibody (BD Transduction Laboratories) or mouse IgG (Santa Cruz) bound to Protein G coupled to Dynabeads (Invitrogen) by rocking overnight at 4°C. Beads were washed in RIPA buffer (50 mM Hepes-KOH, pH 7.6, 500 mM LiCl, 1 mM EDTA, 1% NP40, 0.7% sodium deoxycholate) and bound complexes were eluted at 65°C for 1 hour in buffer containing 1% SDS, 10 mM EDTA, 50 mM Tris-HCl, pH 8.0. ChIP products were analyzed by quantitative PCR using specific primers to putative Wnt-responsive sequences (Table S5). Primers annealing to the *Axin2* locus have been published (91, 92). ChIP signals were calculated as percent of the starting chromatin (input). Values obtained with control IgG (background) were subtracted from values obtained with the anti- $\beta$ -Catenin antibody. The resulting binding of  $\beta$ -Catenin to individual responsive elements in Wnt3a-treated cells was expressed as fold of the binding observed in cells cultured in the same conditions but without addition of Wnt3a. To identify the potential Wnt-responsive elements, the region 2 kb upstream and 5 kb downstream to the transcription starting site of *Tgfb2* was analyzed and ranked for evolutionary conservation with Mulan and with GERP++ software programs (93, 94).

Supplementary Figures

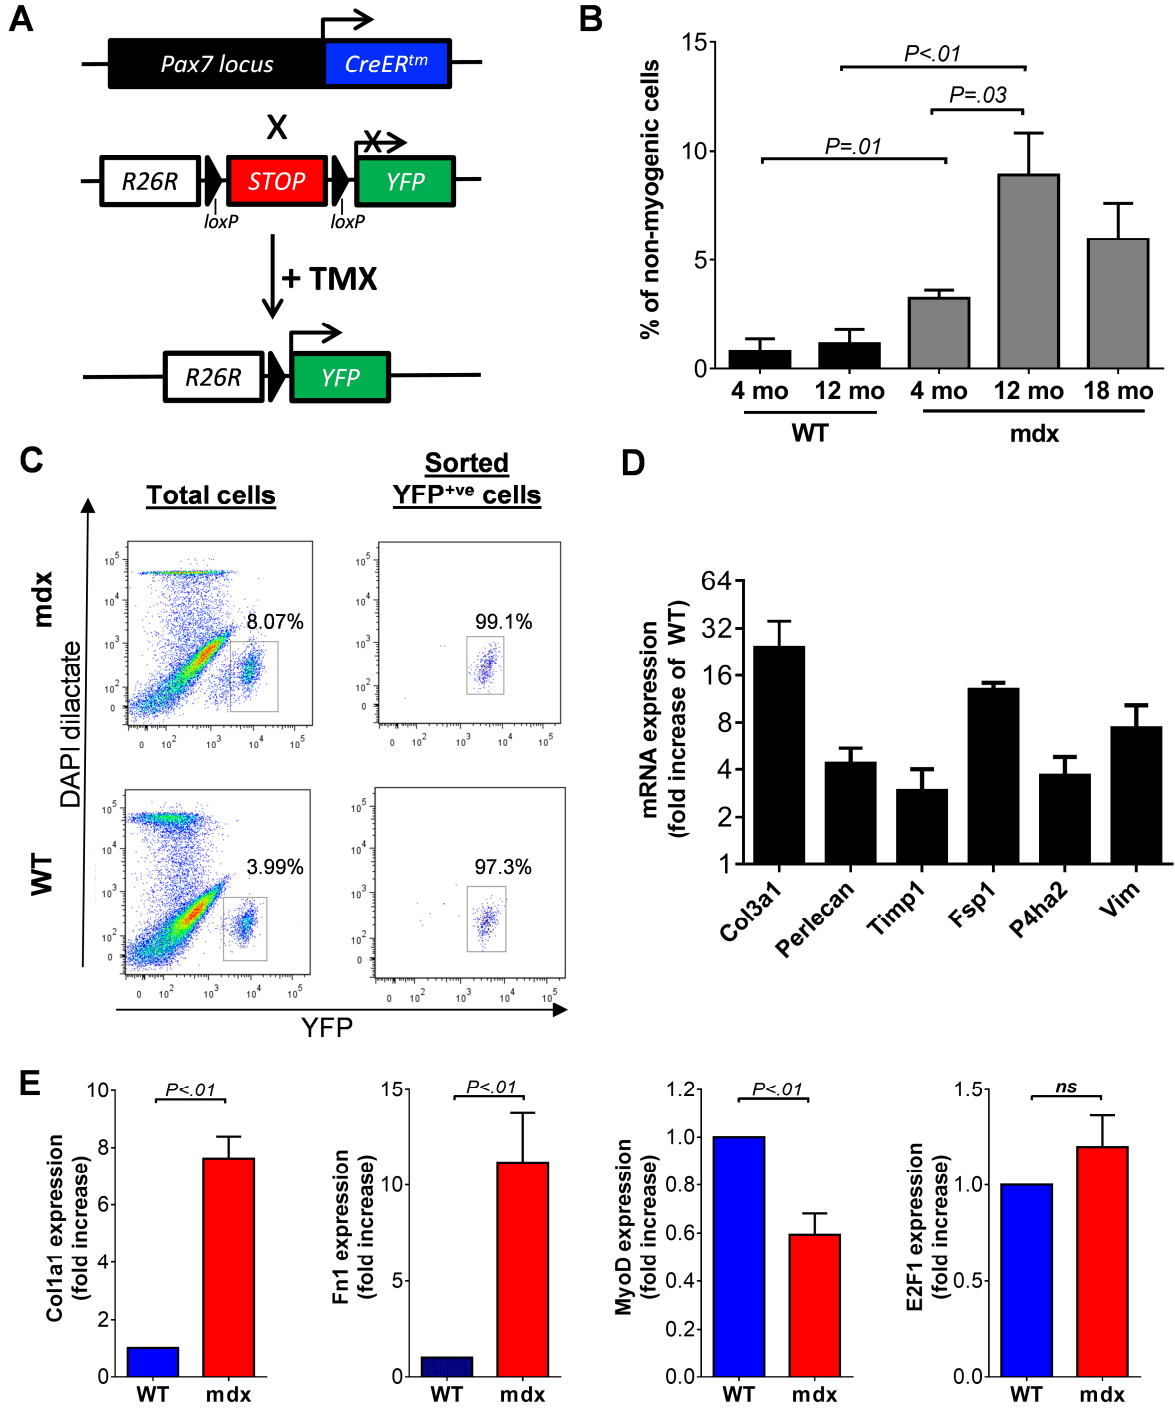

**Fig. S1. Fibrotic features are induced in satellite cells in  $mdx^{5Cv}$  mice.**

(A) Cre/LoxP-based strategy to trace *in vivo* the fate of satellite cells. (B) Cells were isolated from diaphragms of  $Pax7^{CreER};R26R^{YFP};mdx^{5Cv}$  or  $Pax7^{CreER};R26R^{YFP};WT$  mice at the indicated ages, fixed the day after isolation and stained for Pax7, MyoD, and Myogenin. The percentage of  $YFP^{+ve}$  cells which are non-myogenic was quantified ( $N \geq 3$ ). (C) Pure satellite cell progeny ( $YFP^{+ve}$  cells) were isolated from  $mdx^{5Cv}$  and  $WT$  mice by FACS. (D) RT-PCR of the expression of the fibrotic genes (Col3a1, Perlecan, Timp1, Fsp1, P4ha2 and Vimentin (Vim)) in satellite cell progeny purified as in Fig. 1C. Data are expressed as fold increase of the expression in cells isolated from  $WT$  age-matched mice (logarithmic scale). The expression of the evaluated genes is higher in cells isolated from  $mdx^{5Cv}$  than from  $WT$  mice ( $N=4$ ;  $P < .05$  for each gene). (E) RT-PCR of the expression of Col1a1, Fn1, MyoD, and the proliferation associated gene E2F1 in  $VCAM^{+ve}/Lin^{-ve}$  satellite cells isolated from 12-month-old  $mdx^{5Cv}$  and  $WT$  mice by FACS as described in the Methods and cultured for 4 days *in vitro*. Data are expressed as fold increase of the expression in cells isolated from  $WT$  mice ( $N=3$ ).

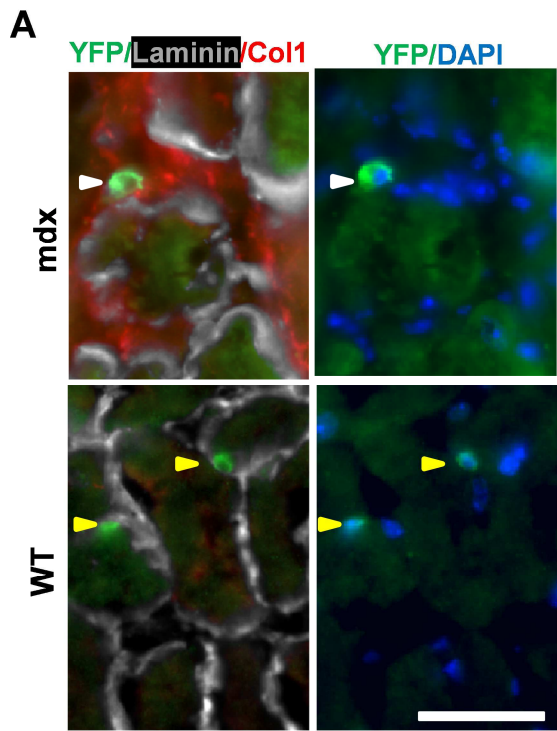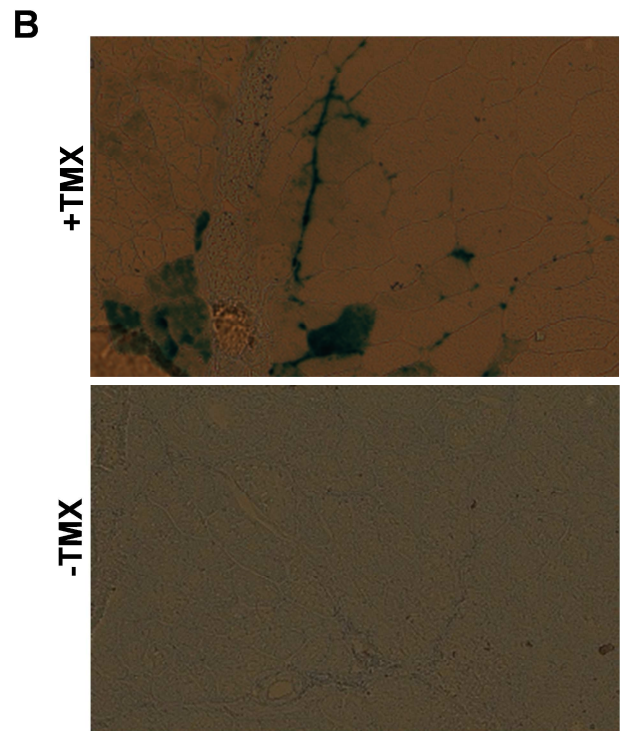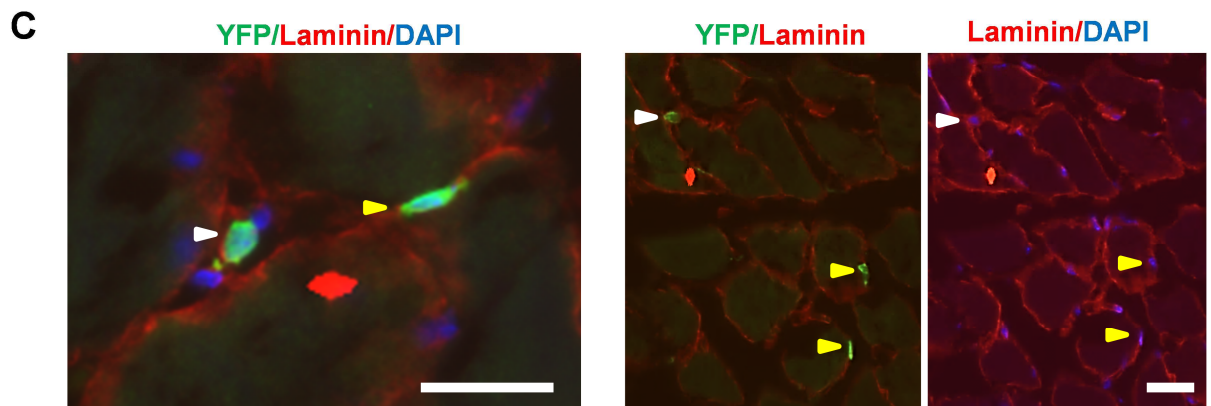

**Fig. S2. Cells of the satellite cell lineage are present in the muscle interstitium in *mdx*<sup>5Cv</sup> mice.**

**(A)** Diaphragms of 12-month-old *Pax7*<sup>CreER</sup>;*R26R*<sup>YFP</sup>;*mdx*<sup>5Cv</sup> and *Pax7*<sup>CreER</sup>;*R26R*<sup>YFP</sup>;*WT* mice were stained with antibodies recognizing YFP, Laminin and the extracellular matrix component Collagen1. Examples of YFP<sup>+ve</sup> cells that were observed in *mdx* mouse muscles to be outside the basal lamina are indicated by white arrowheads. YFP<sup>+ve</sup> cells in the typical sublaminar position in *WT* mouse muscles are indicated by the yellow arrowheads. Bar, 100 μm. **(B)** Sections of TA muscles of 10-month-old of TMX-treated *Pax7*<sup>CreER</sup>;*R26R*<sup>LacZ</sup>;*mdx*<sup>5Cv</sup> mice were stained with Xgal. Note the intense blue staining in the interstitium of TMX-treated mice. Mice not injected with TMX were used as negative controls. **(C)** Diaphragms of 12-month-old *Pax7*<sup>CreER</sup>;*R26R*<sup>YFP</sup> mice were stained with antibodies recognizing YFP and Laminin. Examples of rare YFP<sup>+ve</sup> cells that were observed in *Pax7*<sup>CreER</sup>;*R26R*<sup>YFP</sup>;*WT* mouse muscles to be physically separated from the fibers are indicated by white arrowheads. YFP<sup>+ve</sup> cells in the typical sublaminar position juxtaposed to the fiber are indicated by the yellow arrowheads. Bar, 25 μm.

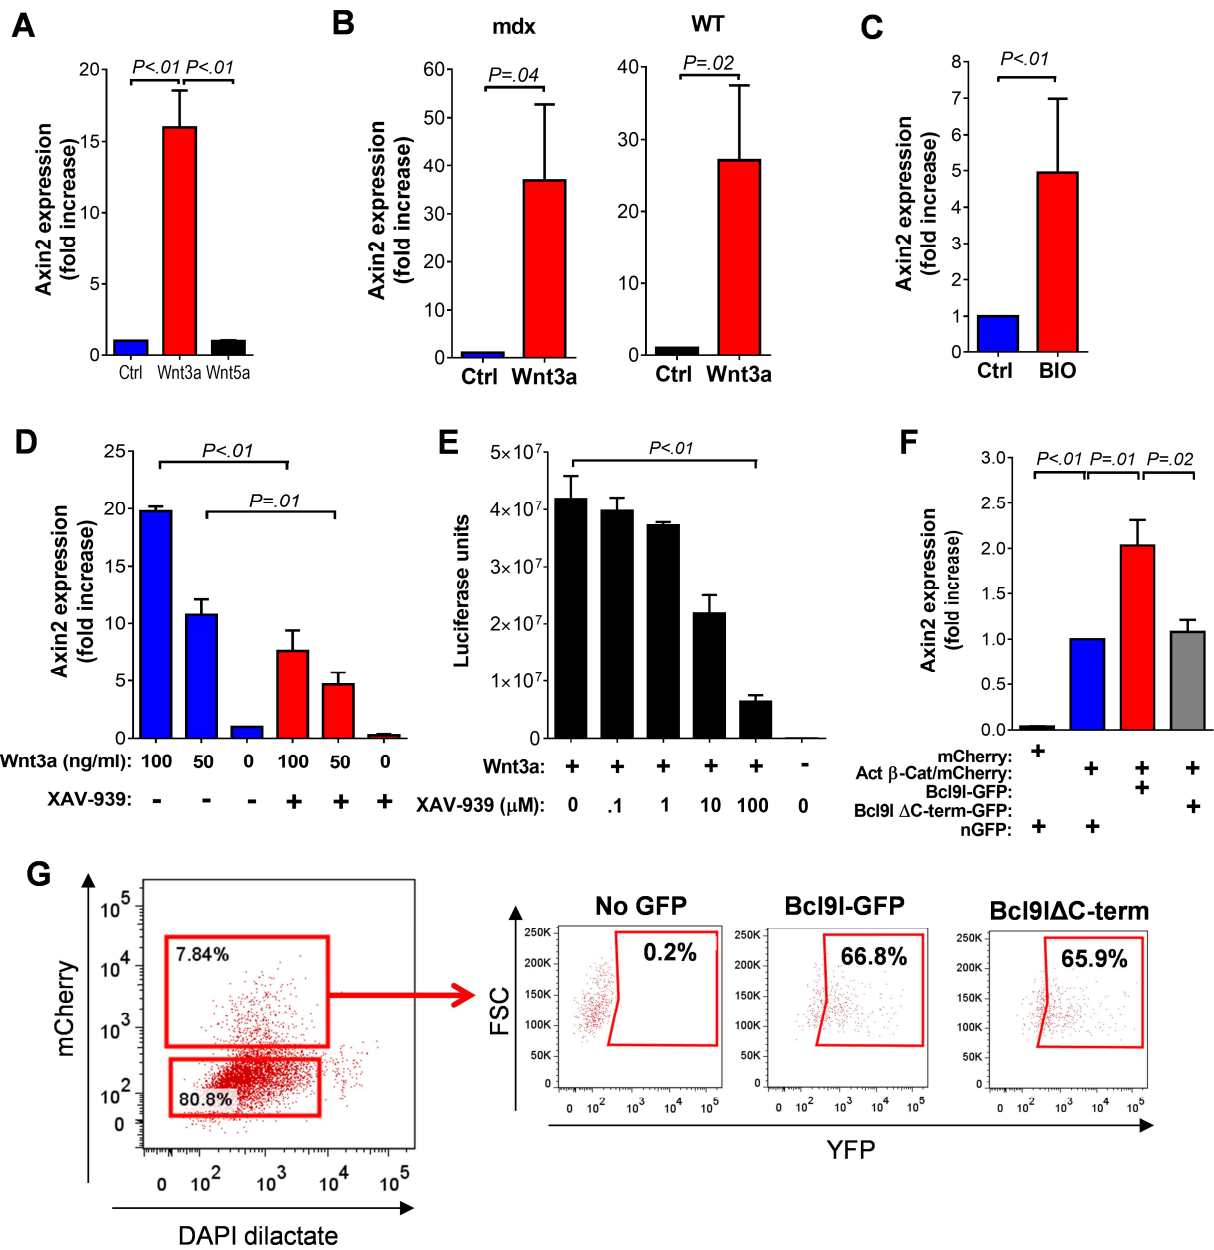



**Fig. S3. In vitro alteration of canonical Wnt signaling.**

(A,B) Axin2 was evaluated by RT-PCR in (A) primary myoblasts (N=3) and (B) YFP<sup>+ve</sup> cells purified by FACS from 12-month-old *Pax7<sup>CreER</sup>;R26R<sup>YFP</sup>;mdx<sup>5Cv</sup>* (N=3) and *Pax7<sup>CreER</sup>;R26R<sup>YFP</sup>;WT* (N=4) mice after treatment with Wnt3a or Wnt5a (each at 100 ng/ml). Data are expressed as fold increase of the expression in untreated cells. (C,D) Axin2 was evaluated by RT-PCR in myoblasts treated for 24 hours with BIO (1  $\mu$ M) (C) or with XAV-939 (100  $\mu$ M) in the presence of indicated concentrations of Wnt3a (D) (N=3 for all conditions). (E) Effects of different doses of XAV-939 on the luciferase activity of LSL cells treated with Wnt3a (100 ng/ml). (F) Axin2 was evaluated by RT-PCR in myoblasts after transfection with the indicated vectors. Data are expressed as fold increase of the expression in cells transfected with the act  $\beta$ -Cat/mCherry expressing plasmid (N=3 for all conditions). (G) The efficiency of transfection of plasmids expressing Bcl9l- or Bcl9l $\Delta$ C-term-GFP fusion proteins was quantified for active  $\beta$ -Catenin/mCherry<sup>+ve</sup> in myoblasts by evaluating the percent of mCherry<sup>+ve</sup> cells that were also GFP<sup>+ve</sup>. In the Bcl9l $\Delta$ C-term-GFP construct, the C-terminal amino acids 886-1384 of Bcl9l are lacking. Cells not expressing GFP were used to set the autofluorescence. DAPI dilactate was used to identify dead cells.

**A**

*mTgfβ2* locus

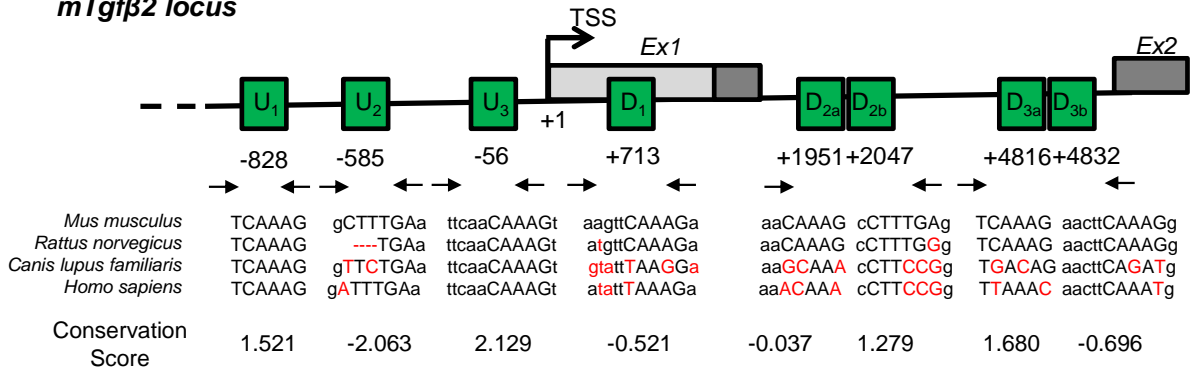

**B**

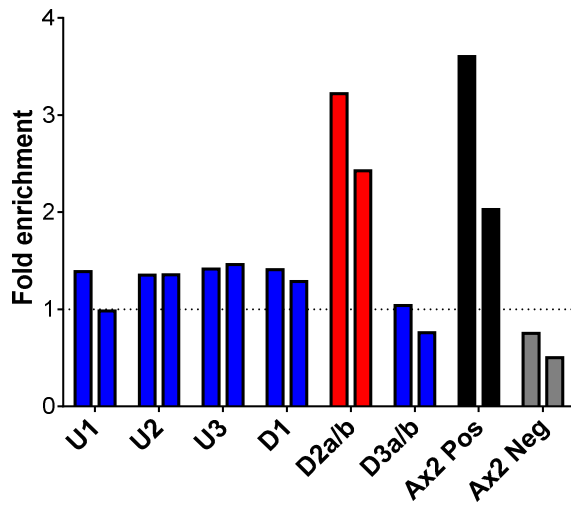

**Fig. S4.  $\beta$ -Catenin binds to the *Tgf $\beta$ 2* locus.**

(A) Schematic representation of the region of the mouse *Tgf $\beta$ 2* gene from -2 kb to +5 kb from the transcription starting site (TSS). Putative WREs are depicted in green (3 upstream (U), and 5 downstream (D) of the TSS). Arrows represent the primer pairs used in the ChIP assay. The sequences of the candidate WRE in four mammalian species are listed. In red are the bases that differ from the mouse sequence. The core consensus sequence is depicted with capital letters. A conservation score was attributed to each putative WRE with GERP++ software. (B) ChIP-qPCR analysis of  $\beta$ -Catenin binding to different regions of the mTgf $\beta$ 2 locus. Myoblasts were treated with Wnt3a for 4 hours. Each column represents a distinct biological replicate. In the case of the positive control (Ax2 Pos), different primer sets were used in the two replicates (see Table S3).

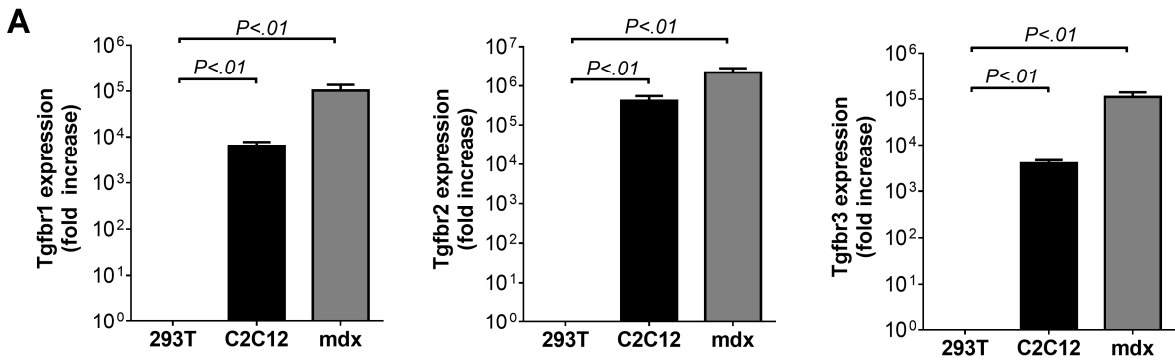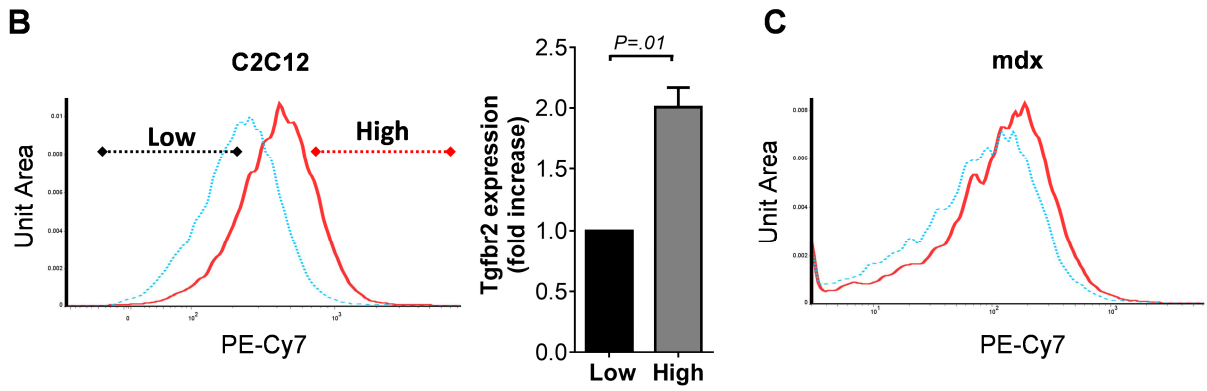

**Fig. S5. Expression of TGFβ receptors in satellite cell progeny.**

(A) RT-PCR analysis of the expression of the murine TGFβ receptors Tgfbr1, 2 and 3 in C2C12 myoblasts and YFP<sup>+ve</sup> cells purified from hindlimb muscles of 4-month-old *Pax7<sup>CreER</sup>;R26R<sup>YFP</sup>;mdx<sup>5Cv</sup>* mice (N=3 for each cell type). Data are expressed as fold increase of the expression in human kidney 293T cells (logarithmic scale). Mouse specific primers were employed for the detection of Tgfbr1, 2 and 3. Primers amplifying both human and mouse Hprt were used for normalization. (B, C) The expression of TGFβ receptor 2 was evaluated by FACS analysis. Representative FACS plots of C2C12 (B) and YFP<sup>+ve</sup> cells from hindlimb muscles of 4-month-old *Pax7<sup>CreER</sup>;R26R<sup>YFP</sup>;mdx<sup>5Cv</sup>* mice (C) incubated with TGFβ receptor 2 specific (red) or isotype control (blue) antibodies (PE-Cy7). The specificity of the antibody recognizing TGFβ receptor 2 was verified by RT-PCR analysis of the expression of Tgfbr2 in fractions of C2C12 (~15% of the total cell population) with high or low PE-Cy7 staining. Data are expressed as fold increase of the expression in the PE-Cy7<sup>Low</sup> fraction (N=3).

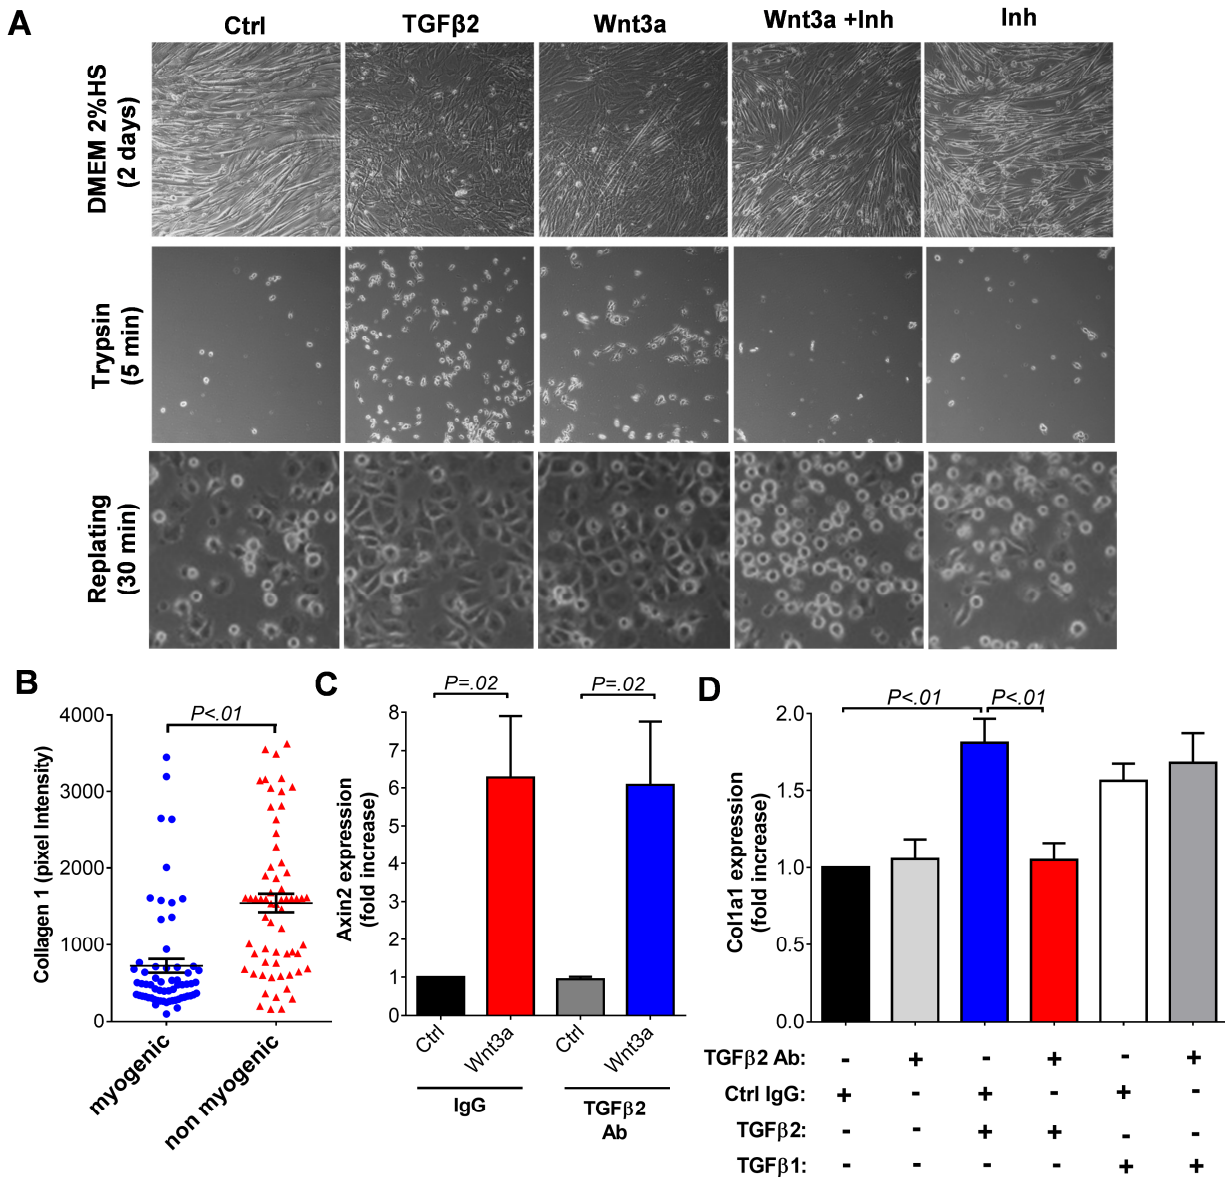

**Fig. S6. Wnt-TGF $\beta$ 2 axis induces fibrogenic features in myoblasts in vitro.**

(A) C2C12 myoblasts were cultured for 2 days in the presence of TGF $\beta$ 2 (10 ng/ml), Wnt3a (100 ng/ml), Wnt3a together with the ALK5 inhibitor II (5  $\mu$ M), or ALK5 inhibitor II alone (Inh). TGF $\beta$ 2 and Wnt3a treatments enhance the adhesion properties of the cells as highlighted by the number of attached cells after 5 minutes of trypsinization or by analysis of the morphology of the cells after 30 minutes of replating (see Methods). Note that both TGF $\beta$ 2- and Wnt3a-treated cells are more spread in comparison to control cultures. (B) The intensity of the staining for Collagen1 was quantified in C2C12 myoblasts processed as in Fig. 4A in the presence of TGF $\beta$ 2 (10 ng/ml) and correlated with the presence (“myogenic”) or absence (“non-myogenic”) of the myogenic markers Pax7, MyoD, Myogenin. The analysis was performed on at least 60 cells from 3 independent experiments. (C) RT-PCR analysis of the expression of Axin2 in C2C12 myoblasts cultured with or without Wnt3a (100 ng/ml), with addition of a TGF $\beta$ 2-blocking antibody or rabbit IgG (both 12.5  $\mu$ g/ml). Cells were processed as in Fig. 4A. Data are expressed as fold increase of the expression in cells treated with IgG (N=3 for each condition). (D) Inhibition of TGF $\beta$ 2- (but not TGF $\beta$ 1-) dependent Colla1 expression in C2C12 myoblasts after treatment with a TGF $\beta$ 2-blocking antibody (12.5  $\mu$ g/ml). Cells were treated with TGF $\beta$ 1 or TGF $\beta$  2 (5 ng/ml) for 24 hours. Rabbit IgG (12.5  $\mu$ g/ml) was used as control (N=3 for each condition). Note that the TGF $\beta$ 1-dependent induction of Colla1 expression is completely unaffected by the presence of a TGF $\beta$ 2-blocking antibody.

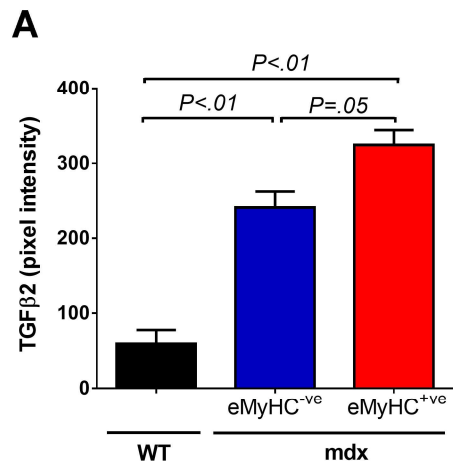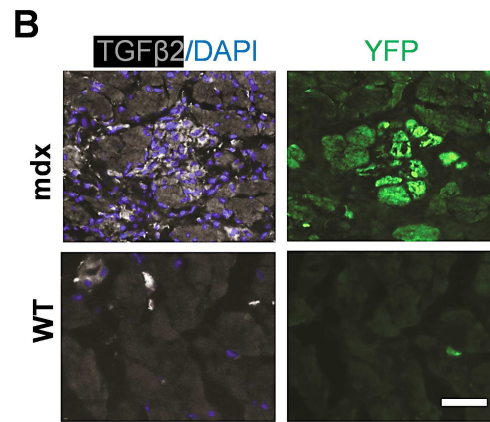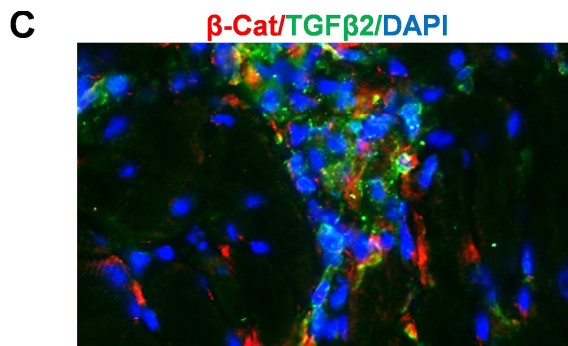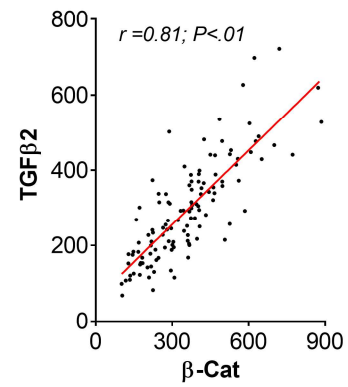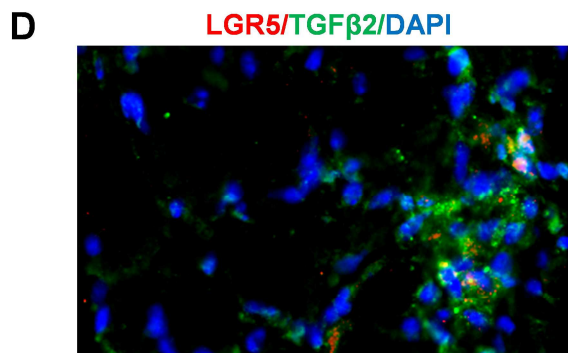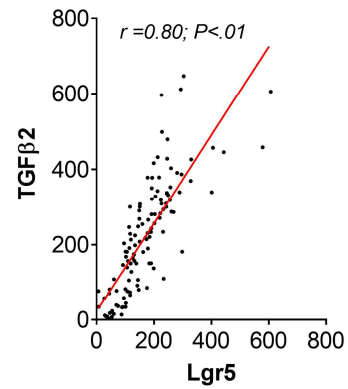



**Fig. S7. The Wnt-Tgf $\beta$ 2 axis is active in dystrophic muscles.**

(A) The average intensity of the signal corresponding to TGF $\beta$ 2 was evaluated in distinct regions of muscles processed as in Fig. 5B and selected according to the presence or absence of eMyHC<sup>+ve</sup> fibers (no eMyHC<sup>+ve</sup> fibers were seen in *WT* muscles) (N=3 for each genotype). (B) Diaphragms of 12-month-old *Pax7<sup>CreER</sup>;R26R<sup>YFP</sup>;mdx<sup>5Cv</sup>* and *Pax7<sup>CreER</sup>;R26R<sup>YFP</sup>;WT* mice were stained for TGF $\beta$ 2 and YFP. Note that TGF $\beta$ 2 staining characterizes the YFP<sup>+ve</sup> areas in *mdx<sup>5Cv</sup>* muscles. Bar, 25  $\mu$ m. (C,D) Diaphragms of 6-month-old *mdx<sup>5Cv</sup>* mice were stained with antibodies recognizing TGF $\beta$ 2 and either (C)  $\beta$ -Catenin or (D) LGR5 . The average intensity of each signal was evaluated in 120 randomly selected regions of the muscles (see Methods). The correlation between the values obtained for each staining in each region is shown. Linear regression, Pearson r and corresponding P-value are indicated.

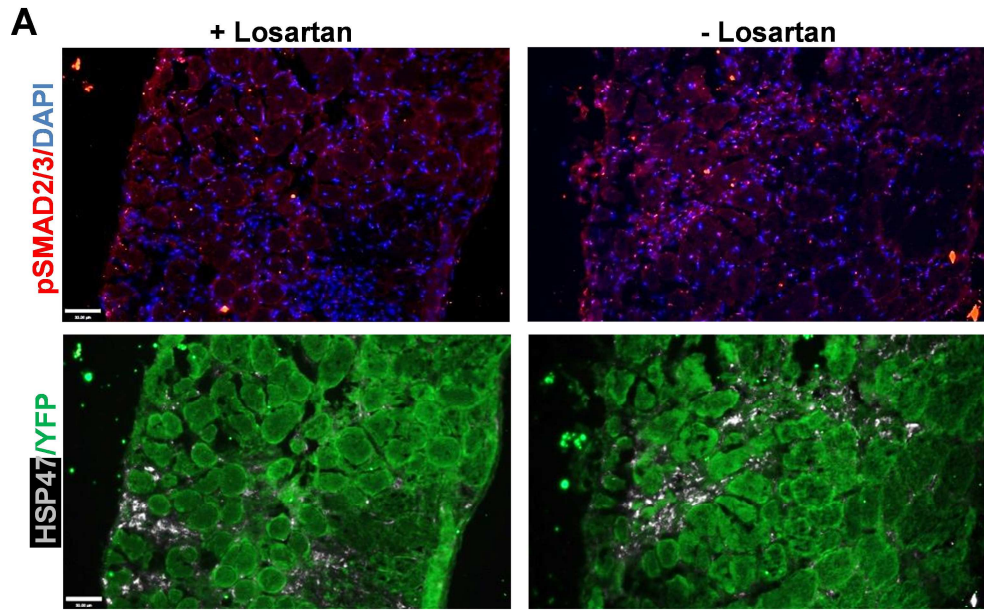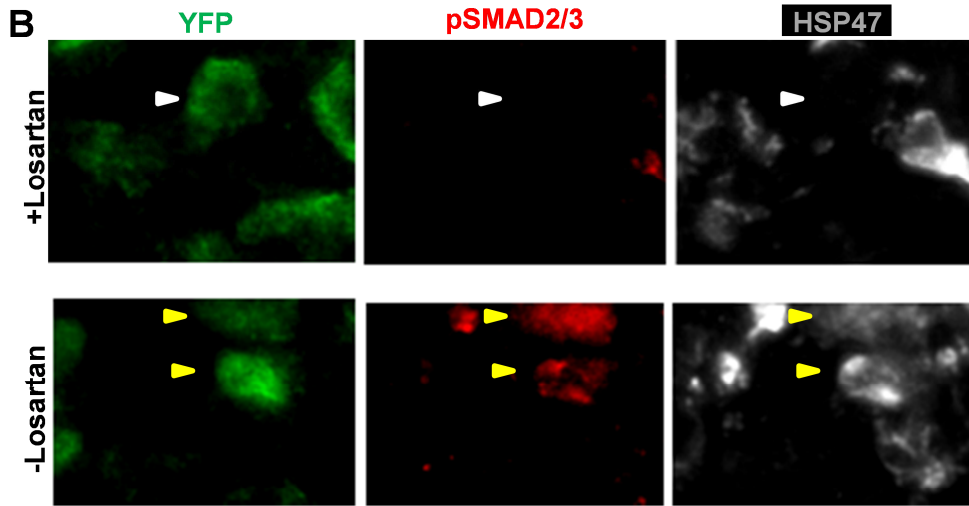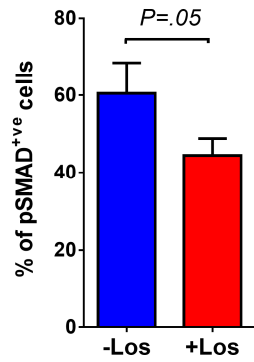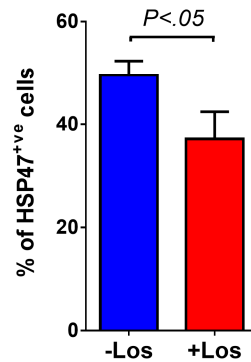

**Fig. S8. TGF $\beta$  signaling induces fibrogenic features in satellite cells in *mdx*<sup>5Cv</sup> muscles.**

(A,B) Muscles of Losartan- or placebo-treated *Pax7*<sup>CreER</sup>;*R26R*<sup>YFP</sup>;*mdx*<sup>5Cv</sup> mice were stained for YFP, pSMAD2/3 and HSP47. (A) Low magnification images of diaphragm sections are presented. Bar, 50  $\mu$ m. (B) Examples of YFP<sup>+</sup> cells negatively or positively stained for both pSMAD2/3 and HSP47 are indicated by white and yellow arrowheads, respectively. Quantitation of the percentage of YFP<sup>+</sup> cells expressing each fibrogenic marker individually is presented below.

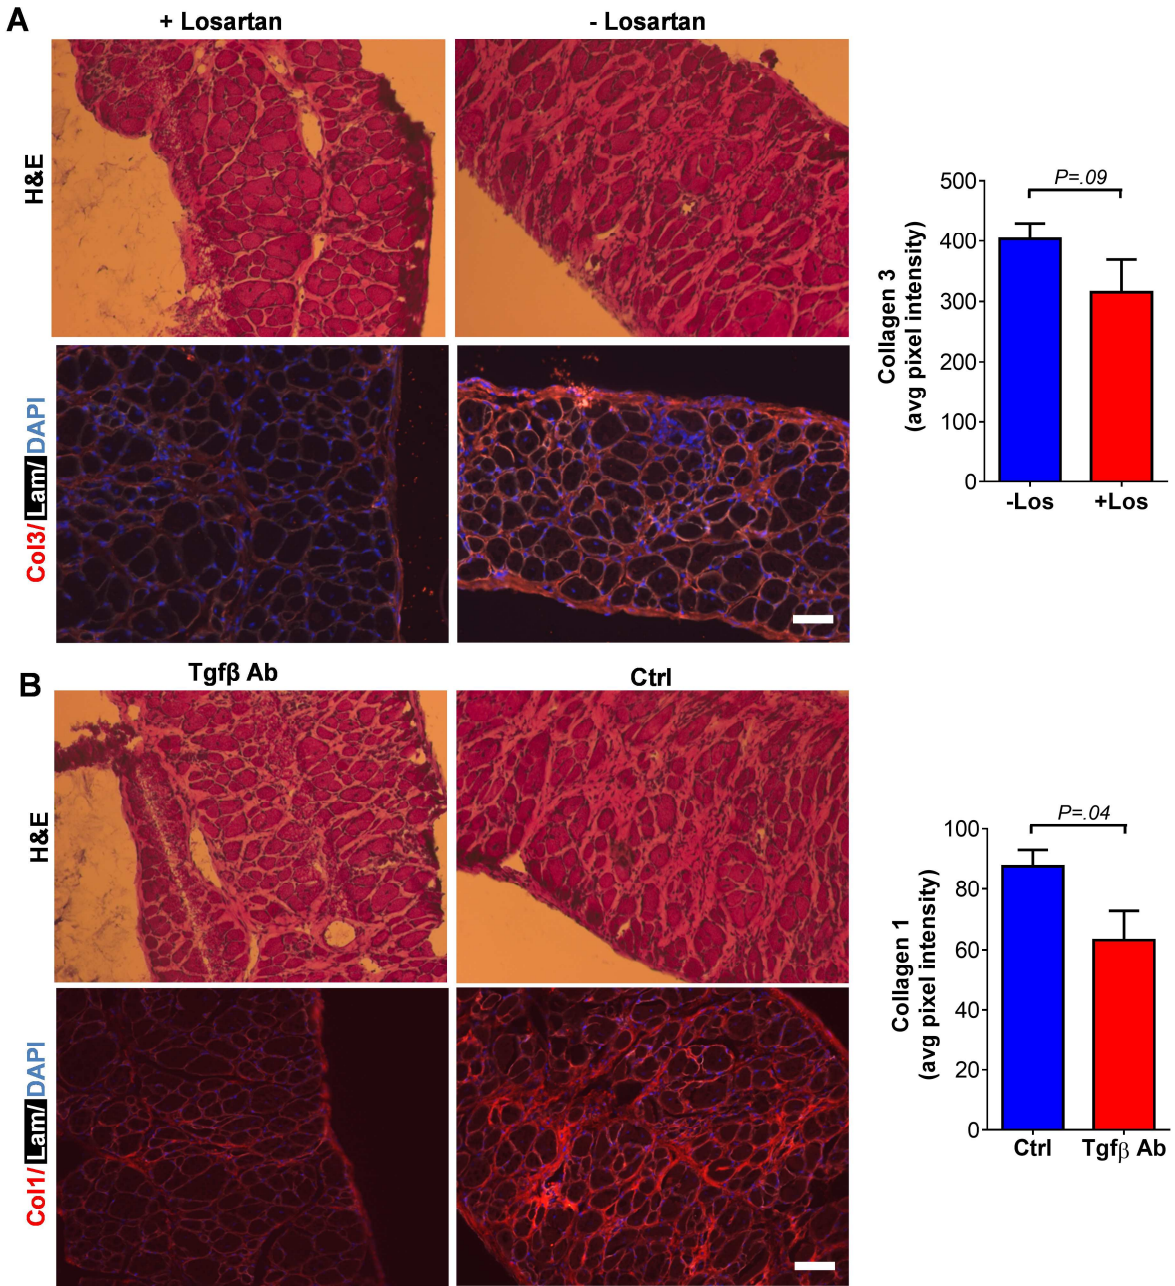

**Fig. S9. Blocking TGF $\beta$  signaling ameliorates the dystrophic phenotype.**

(A,B) Diaphragms of *Pax7<sup>CreER</sup>;R26R<sup>YFP</sup>;mdx<sup>5Cv</sup>* mice treated with Losartan or placebo (N=4) (A), with TGF $\beta$ -blocking (1D11), or anti-Shigella toxin (Ctrl) antibodies (N=7) (B) were stained with H&E or for Collagen1 or 3 and Laminin. DAPI stains the nuclei. Bar, 50  $\mu$ m. The average intensity of the signal corresponding to Collagen was evaluated for each treatment.

## Supplementary Tables

**Table S1.** List of genes that are significantly increased ( $\geq 2.5$ -fold) in Wnt3a-treated myoblasts.

| Gene Symbol         | ProbeID             | Control            | Wnt3a              | Fold         |
|---------------------|---------------------|--------------------|--------------------|--------------|
| <i>Calcb</i>        | 1422639_at          | 26.70907724        | 2616.829484        | 97.98        |
| <i>Calca</i>        | 1452004_at          | 20.36274781        | 419.4051869        | 20.60        |
| <i>Car3</i>         | 1430584_s_at        | 131.3183689        | 1838.354393        | 14.00        |
| <i>Car3</i>         | 1453588_at          | 32.13190182        | 405.1630059        | 12.61        |
| <b><i>Axin2</i></b> | <b>1436845_at</b>   | <b>98.67346723</b> | <b>1219.869765</b> | <b>12.36</b> |
| <i>Bhlhe40</i>      | 1418025_at          | 103.5675868        | 982.1134238        | 9.48         |
| <i>Ppargc1a</i>     | 1434100_x_at        | 19.02765044        | 147.2386398        | 7.74         |
| <i>Car2</i>         | 1448752_at          | 118.109751         | 911.910012         | 7.72         |
| <i>Ppargc1a</i>     | 1434099_at          | 14.05849061        | 96.18214563        | 6.84         |
| <i>Fst</i>          | 1421365_at          | 882.8056318        | 5662.02014         | 6.41         |
| <i>Ppargc1a</i>     | 1460336_at          | 36.33621931        | 208.1895233        | 5.73         |
| <i>Fst</i>          | 1434458_at          | 1113.43476         | 6004.755452        | 5.39         |
| <i>Pfn2</i>         | 1418210_at          | 631.9398458        | 3309.648673        | 5.24         |
| <i>Ppargc1a</i>     | 1456395_at          | 25.40153332        | 132.7142917        | 5.22         |
| <i>Ppargc1a</i>     | 1437751_at          | 21.1837345         | 110.5634991        | 5.22         |
| <i>Pfn2</i>         | 1418209_a_at        | 663.3497889        | 3462.178669        | 5.22         |
| <i>Pfn2</i>         | 1436993_x_at        | 328.0499455        | 1642.878217        | 5.01         |
| <i>lsm1</i>         | 1436987_at          | 16.56106105        | 82.80319698        | 5.00         |
| <i>Syt13</i>        | 1434470_at          | 55.80822367        | 264.9021055        | 4.75         |
| <i>Syt13</i>        | 1451045_at          | 54.0404085         | 252.3064168        | 4.67         |
| <b><i>Tgfb2</i></b> | <b>1450923_at</b>   | <b>31.3951713</b>  | <b>137.2891924</b> | <b>4.37</b>  |
| <i>Car3</i>         | 1460256_at          | 731.4390361        | 2977.992388        | 4.07         |
| <b><i>Tgfb2</i></b> | <b>1423250_a_at</b> | <b>106.3891382</b> | <b>409.2536031</b> | <b>3.85</b>  |
| <b><i>Tgfb2</i></b> | <b>1450922_a_at</b> | <b>88.1490555</b>  | <b>336.638129</b>  | <b>3.82</b>  |
| <i>Osr2</i>         | 1426155_a_at        | 53.78782853        | 204.7386398        | 3.81         |
| <i>Lifr</i>         | 1454984_at          | 59.25552552        | 225.2386398        | 3.80         |
| <i>Wnt5a</i>        | 1436791_at          | 31.03436134        | 109.1951936        | 3.52         |
| <b><i>Axin2</i></b> | <b>1421341_at</b>   | <b>18.88612863</b> | <b>64.56095847</b> | <b>3.42</b>  |
| <i>BB038663</i>     | 1446563_at          | 103.2394776        | 343.8044788        | 3.33         |
| <i>Nrcam</i>        | 1434709_at          | 114.7558432        | 371.8416457        | 3.24         |
| <i>Rasl11b</i>      | 1423854_a_at        | 90.11401885        | 289.8033889        | 3.22         |
| <i>Fam84a</i>       | 1425452_s_at        | 28.58190019        | 90.67327139        | 3.17         |
| <i>Irx3</i>         | 1418517_at          | 196.3641917        | 613.7417973        | 3.13         |
| <i>Acsl3</i>        | 1428386_at          | 203.7386398        | 582.2386398        | 2.86         |
| <i>Acsl3</i>        | 1452771_s_at        | 336.868553         | 956.3677514        | 2.84         |
| <i>Jak2</i>         | 1421065_at          | 136.5506239        | 386.4219271        | 2.83         |
| <i>Slc2a3</i>       | 1437052_s_at        | 89.29266744        | 246.5897868        | 2.76         |
| <i>Car3</i>         | 1449434_at          | 5208.809811        | 14357.96093        | 2.76         |
| <i>Jak2</i>         | 1421066_at          | 351.5763815        | 964.7786623        | 2.74         |
| <i>Calca</i>        | 1427355_at          | 31.86563439        | 87.23339695        | 2.74         |
| <i>Dio2</i>         | 1418937_at          | 82.99111431        | 222.5508219        | 2.68         |
| <i>Tcf7</i>         | 1433471_at          | 171.1299624        | 439.2747763        | 2.57         |
| <i>Slc2a3</i>       | 1455898_x_at        | 23.78046307        | 60.61755574        | 2.55         |
| <i>Cdc42ep2</i>     | 1428750_at          | 219.8579715        | 555.563065         | 2.53         |
| <b><i>Lgr5</i></b>  | <b>1450988_at</b>   | <b>46.89690313</b> | <b>117.2386398</b> | <b>2.50</b>  |

**Table S2.** Primer list for genotyping PCR.

| <b>Gene Name</b> | <b>Forward Primer</b>  | <b>Reverse Primer</b> | <b>T<sub>ann</sub></b> |
|------------------|------------------------|-----------------------|------------------------|
| Cre              | gcatttctggggattgcta    | cccggcaaacaggtagta    | 58°                    |
| YFP/GFP          | aagttcatctgcaccaccg    | tcctgaagaagatggtgcg   | 58°                    |
| LacZ             | gcatcgagctgggtaataagcg | gacaccagaccaactggaatg | 58°                    |

**Table S3.** Primer list for SYBR Green real-time PCR.

| <b>Gene Name</b> | <b>Forward Primer</b>    | <b>Reverse Primer</b>     | <b>T<sub>ann</sub></b> |
|------------------|--------------------------|---------------------------|------------------------|
| <i>mHprt</i>     | tcagaccgcttttgccgca      | atcgctaatacagacgctgggac   | 60°                    |
| <i>mHsp47</i>    | agcgattgccctgtcgggcc     | cacagaggacctgtgagggctga   | 60°                    |
| <i>mCol1a1</i>   | tccggctcctgtcctctta      | gtatgcagctgacttcagggatgt  | 60°                    |
| <i>mCol3a1</i>   | gcccacagccttctacac       | ccagggtcaccatttctc        | 60°                    |
| <i>mTimp1</i>    | tacaccccagtcattgaaagc    | cggcccgtgatgagaaact       | 60                     |
| <i>mFn1</i>      | tgctcgggaatgaaag         | atggtaggtcttccatcgtcata   | 60°                    |
| <i>mVimentin</i> | gcgagagaaattgcaggagga    | cgttcaaggcaagacgtgc       | 60°                    |
| <i>mFSP1</i>     | agctgcctagcttctgggaaaa   | tgtccctgtgcttccaagtgc     | 60°                    |
| <i>mPerlecan</i> | ttccagatggctatttccggg    | ctggcacttgcattcctcc       | 60°                    |
| <i>mAxin2</i>    | cagagggacaggaaccactc     | tgccagttctttggctctt       | 60°                    |
| <i>mLgr5</i>     | tcgccttcccaggtcccttc     | gccgtggtccacaccccgat      | 60°                    |
| <i>mTgfβ2</i>    | cgagcggagcagcaggaggt     | tgggcgggatggcatttctcg     | 60°                    |
| <i>mTgfbr1</i>   | ctgccataaccgcactgtca     | aatgaaagggcgatctagtgatg   | 60°                    |
| <i>mTgfbr2</i>   | gggcatcgctcatctccac      | tccctgtgaacaatgggcat      | 60°                    |
| <i>mTgfbr3</i>   | cctcctccacagatttcca      | cccagatcaagccttctgag      | 60°                    |
| <i>h/mHprt</i>   | aactggaaagaatgtcttgattgt | gaattcaaataccaacaagctctgg | 60°                    |



**Table S4.** Antibody list for immunofluorescence.

| <b>Antigen</b>   | <b>Company</b> | <b>Species/Concentration</b> |
|------------------|----------------|------------------------------|
| Pax7             | DSHB           | Mouse/ 1:200                 |
| MyoD             | DAKO           | Mouse/ 1:100                 |
| Myogenin         | BD             | Mouse/1:100                  |
| Col1             | Cederlane      | Rabbit/ 1:200                |
| Col3             | Abcam          | Rabbit/ 1:200                |
| HSP47            | Abcam          | Rabbit/ 1:200                |
| Laminin          | Abcam          | Rat/ 1:1000                  |
| GFP              | Invitrogen     | Rabbit/ 1:500                |
| GFP              | Aves           | Chick/1:250                  |
| LGR5             | Abcam          | Rabbit/ 1:100                |
| $\beta$ -Catenin | Abcam          | Rabbit/ 1:100                |
| eMyHC            | DSHB           | Mouse/ 1:20                  |
| Axin2            | Abcam          | Rabbit/ 1:500                |
| TGF $\beta$ 2    | Santa Cruz     | Goat/ 1:20                   |
| TGF $\beta$ 2    | Santa Cruz     | Rabbit/ 1:200                |
| pSMAD2/3         | Santa Cruz     | Goat/ 1:20                   |

**Table S5.** Primer list for ChIP assay.

| <b>Responsive Element</b> | <b>Forward Primer</b>    | <b>Reverse Primer</b>   | <b>T<sub>ann</sub></b> |
|---------------------------|--------------------------|-------------------------|------------------------|
| <i>Tgfβ2 U1</i>           | atcgtggccacagagtcac      | tgctgtctcctgtcacacagt   | 60°                    |
| <i>Tgfβ2 U2</i>           | gatgggtgggtcatccttgtc    | agtgtcccttcacccaatg     | 60°                    |
| <i>Tgfβ2 U3</i>           | gctcgtggtcttagaacagagg   | gctgccagcagataaacatca   | 60°                    |
| <i>Tgfβ2 D1</i>           | gccgggctctaactgagaag     | acatccacacgcacactcat    | 60°                    |
| <i>Tgfβ2 D2a/b</i>        | cccagataggtcagcagggga    | tgacttatgctaagagaccaagg | 60°                    |
| <i>Tgfβ2 D3a/b</i>        | agcgtctttgaatagctgcac    | tttacggatcctgtgcctg     | 60                     |
| <i>Axin2 Pos1</i>         | ctcgcatacctcccttcc       | ttccagcagtcactaggc      | 60°                    |
| <i>Axin2 Pos2</i>         | gagcgcctctgtgattgg       | gaccccaccttttacagcaa    | 60°                    |
| <i>Axin2 Neg</i>          | atctgtatgtcctgtctgccagcg | tgctctgattccaagtcaagcac | 60°                    |
